# Supplementary material
Source: Elsevier journal article supplement (https://www.sciencedirect.com/science/article/pii/S1885585719304268)
Supplement: mmc5 [file mmc5.pdf]

MATERIAL ADICIONAL

**Vídeo 1 del material adicional.** Coronariografía derecha inmediatamente después del implante del Cardioband.

**Vídeo 2 del material adicional.** Coronariografía derecha tras el fruncido del Cardioband.

**Vídeo 3 del material adicional.** Ecocardiografía transesofágica antes del fruncido del Cardioband.

**Vídeo 4 del material adicional.** Ecocardiografía transesofágica tras el fruncido del Cardioband.
